# Supplementary material for: Galactose Oxidase models: 19F NMR as a powerful tool to study the solution chemistry of tripodal ligands in the presence of copper(ii)
Source: Royal Society of Chemistry journal article supplement (doi:10.1039/b605852c), 2006-01-01
Supplement: b605852c.pdf [file b605852c.pdf]

**Galactose Oxidase models:  $^{19}\text{F}$  NMR as a powerful tool to study the  
solution chemistry of tripodal ligands in presence of copper(II).**

By F. Michel, S. Hamman, F. Thomas, C. Philouze, I. Gautier-Luneau, E. Saint-Aman, and J.-L.  
Pierre.

**General:** All chemicals were of reagent grade and used without purification. Microanalyses were performed by the Service Central d'Analyses du CNRS (Lyon, France).

298 K UV-vis spectra were recorded on a Perkin Elmer Lambda 2 spectrophotometer (1.000 cm path length quartz cell).

NMR spectra were recorded on a Bruker AM 300 ( $^1\text{H}$  at 300 MHz,  $^{13}\text{C}$  at 75 MHz,  $^{19}\text{F}$  at 282 MHz). Chemical shifts are given relative to tetramethylsilane (TMS).  $\text{C}_6\text{F}_6$  was used as internal reference for  $^{19}\text{F}$  NMR experiments ( $\delta_{\text{C}_6\text{F}_6} = -162.17$  ppm vs.  $\text{CFCl}_3$ ).

Mass spectra were recorded on a Thermofunnigen (EI/DCI) or a Nermag R 101 C (FAB+) apparatus.

X-band EPR spectra were recorded on a BRUKER ESP 300E spectrometer equipped with a BRUKER nitrogen flow cryostat. Spectra were treated using the WINEPR software and simulated using the BRUKER SIMFONIA software.

### Synthetic procedure:

**6-fluoro-quinolin-ylmethyl)-pyridin-2-ylmethyl-amine:** 6-fluoro-quinoline-2-carbaldehyde (1.0 g, 5.71 mmol) is dissolved in methanol (10 mL). Picolylamine (617 mg, 5.75 mmol in 2 mL methanol) is added dropwise during 30 min. The reaction mixture was stirred for 4 hours at room temperature. Sodium borohydride (216 mg, 5.71 mmol) is then added by small amounts, at 273 K during 30 min. After 3 h stirring, the organic layer was evaporated and HCl (2 M) is added until neutralization. The reaction mixture was extracted with  $\text{CH}_2\text{Cl}_2$  (2×50 mL), washed with saturated NaCl, dried over  $\text{Na}_2\text{SO}_4$  and evaporated. 6-fluoro-quinolin-ylmethyl)-pyridin-2-ylmethyl-amine was purified by silica gel column chromatography with  $\text{CH}_2\text{Cl}_2$  : MeOH (20 : 1) as eluent. 6-fluoro-quinolin-ylmethyl)-pyridin-2-ylmethyl-amine (686 mg, 75%) was obtained as a red oil;  $^1\text{H}$  NMR (300.12 MHz,  $\text{CDCl}_3$ , 298 K, TMS):  $\delta = 3.46$  (s, 1 H), 4.06 (s, 2 H), 4.17 (s, 2 H), 7.15 (dd,  $^3\text{J}(\text{H,H}) = 7.7$  Hz), 7.35-7.47 (m, 3 H), 7.50 (d,  $^3\text{J}(\text{H,H}) = 8.5$  Hz), 7.63 (td, 1 H,  $^3\text{J}(\text{H,H}) = 7.7$  Hz,  $^4\text{J}(\text{H,H}) = 1.8$  Hz), 8.03 (d,  $^3\text{J}(\text{H,H}) = 8.7$  Hz, 1 H), 8.05 (d,  $^3\text{J}(\text{H,H}) = 9.1$  Hz, 1 H), 8.56 (d,  $^3\text{J}(\text{H,H}) = 4.8$  Hz, 1 H);  $^{13}\text{C}$  NMR (75.465 MHz,  $\text{CDCl}_3$ , 298 K, TMS):  $\delta = 55.1$  ( $\text{CH}_2$ ), 55.3 ( $\text{CH}_2$ ), 110.8 (d, CH,  $^2\text{J}(\text{C,F}) = 21.6$  Hz), 119.8 (d, CH,  $^2\text{J}(\text{C,F}) = 25.4$  Hz), 121.6 (CH), 122.4 (CH), 122.8 (CH), 128.2 (d, Cq,  $^3\text{J}(\text{C,F}) = 10.0$  Hz), 131.8 (d, CH,  $^3\text{J}(\text{C,F}) = 9.1$  Hz), 136.2 (d, CH,  $^4\text{J}(\text{C,F}) = 5.2$  Hz), 136.8 (CH), 145.1 (Cq), 149.7 (CH), 159.5 (d, Cq,  $^4\text{J}(\text{C,F}) = 2.8$  Hz), 159.6 (Cq), 160.5 (d, Cq,  $^1\text{J}(\text{C,F}) = 247.3$  Hz);  $^{19}\text{F}$  NMR (188.313 MHz,  $\text{CDCl}_3$ , 298 K, TMS):  $\delta = 47.8$  (td, 1F,  $^3\text{J}(\text{F,H}) = 8.5$  Hz,  $^4\text{J}(\text{F,H}) = 6.1$  Hz); MS (DCI,  $\text{NH}_3$  isobutane), m/z, 268 (M+H)<sup>+</sup>.

**2-tert-butyl-6-{[(6-fluoro-quinolin-2-ylmethyl)-pyridin-2-ylmethyl-amino]-methyl}-4-nitro-phenol:** 3-tert-butyl-2-hydroxy-5-nitro-benzaldehyde (500 mg, 2.2 mmol, prepared according to F. Thomas et al., *Chem. Eur. J.*, **2003**, *9*, 3803), 6-fluoro-quinolin-ylmethyl)-pyridin-2-ylmethyl-amine (598 mg, 2.2 mmol) and 0.1 mL glacial acetic acid are dissolved in 50 mL methanol. Sodium cyanoborohydride (280 mg, 4.4 mmol) is added by small amounts, during 8 hours. After 12 h stirring, the reaction mixture is neutralized by HCl (2 M), extracted with  $\text{CH}_2\text{Cl}_2$  (2×50 mL), washed with saturated NaCl, dried over  $\text{Na}_2\text{SO}_4$  and evaporated. 2-tert-butyl-6-{[(6-fluoro-quinolin-2-ylmethyl)-pyridin-2-ylmethyl-amino]-methyl}-4-nitro-phenol was purified by silica gel column chromatography one time with  $\text{CH}_2\text{Cl}_2$  : MeOH (60 : 1) as eluent and an other time with diethyl ether followed by diethyl ether : methanol (10 : 1). 2-tert-butyl-6-{[(6-fluoro-quinolin-2-ylmethyl)-pyridin-2-ylmethyl-amino]-methyl}-4-nitro-phenol (275 mg, 30 %) was obtained as a yellow oil;  $^1\text{H}$  NMR (300.12 MHz,  $\text{CDCl}_3$ , 298 K, TMS):  $\delta = 1.56$  (s, 9 H), 3.94 (s, 4 H), 4.11 (s, 2 H), 7.16 (dd, 1 H,  $^3\text{J}(\text{H,H}) = 7.4$  Hz), 7.30-7.42 (m, 3 H), 7.51 (ddd, 1 H,  $^3\text{J}(\text{H,F}) = 8.4$  Hz,  $^3\text{J}(\text{H,H}) = 8.3$  Hz,  $^4\text{J}(\text{H,H}) = 2.8$  Hz), 7.60 (td, 1 H,  $^3\text{J}(\text{H,H}) = 7.7$  Hz,  $^4\text{J}(\text{H,H}) = 1.8$  Hz), 7.95 (d, 1 H,  $^4\text{J}(\text{H,H}) = 2.8$

Hz), 8.04 (d, 1 H,  $^3J(\text{H,H}) = 8.6$  Hz), 8.17 (d, 1 H,  $^4J(\text{H,H}) = 2.8$  Hz), 8.24 (dd, 1 H,  $^3J(\text{H,H}) = 9.4$  Hz,  $^4J(\text{H,F}) = 5.4$  Hz), 8.56 (d,  $^3J(\text{H,H}) = 4.9$  Hz);  $^{13}\text{C}$  NMR (75.465 MHz,  $\text{CDCl}_3$ , 298 K, TMS):  $\delta = 29.6$  ( $\text{CH}_3$ , tBu), 35.6 (Cq), 57.3 ( $\text{CH}_2$ ), 59.3 ( $\text{CH}_2$ ), 59.7 ( $\text{CH}_2$ ), 111.1 (d, CH,  $^2J(\text{C,F}) = 21.5$  Hz), 120.3 (d, CH,  $^2J(\text{C,F}) = 25.3$  Hz), 121.8 (CH), 122.8 (CH), 123.4 (CH), 123.5 (CH), 123.9 (Cq), 125.0 (CH), 128.3 (d, Cq,  $^3J(\text{C,F}) = 10.1$  Hz), 131.3 (d, CH,  $^3J(\text{C,F}) = 9.0$  Hz), 136.7 (d, CH,  $^4J(\text{C,F}) = 5.5$  Hz), 137.3 (CH), 138.1 (Cq), 139.5 (Cq), 144.7 (Cq), 149.2 (CH), 158.0 (d, Cq,  $^4J(\text{C,F}) = 2.8$  Hz), 158.2 (Cq), 160.8 (d, Cq,  $^1J(\text{C,F}) = 248.3$  Hz), 163.4 (Cq);  $^{19}\text{F}$  NMR (282.395 MHz,  $\text{CDCl}_3$ , 298 K, TMS):  $\delta = 48.5$  (td, 1F,  $^3J(\text{F,H}) = 8.4$  Hz,  $^4J(\text{F,H}) = 5.1$  Hz); MS (DCI,  $\text{NH}_3$  isobutane),  $m/z$ , 475 (M+H) $^+$ . Anal. Calcd for  $\text{C}_{27}\text{H}_{27}\text{FN}_4\text{O}_3$ : C, 68.34; H, 5.74; N, 11.81 %. Found: C, 67.95; H, 5.78; N, 11.78 %.

(**1**)( $\text{ClO}_4^-$ ): 2-*tert*-butyl-6-[[[(6-fluoro-quinolin-2-ylmethyl)-pyridin-2-ylmethyl-amino]-methyl]-4-nitro-phenol (300 mg, 0.633 mmol) was treated by 1 equivalent of  $\text{NEt}_3$  in  $\text{CH}_3\text{CN}$  (10 mL) prior to addition of 1 eq of  $\text{Cu}(\text{ClO}_4)_2 \cdot 6 \text{H}_2\text{O}$  (3 ml  $\text{CH}_3\text{CN}$  solution, 234 mg, 0.633 mmol). (**1**)( $\text{ClO}_4^-$ ) was recrystallized by slow diffusion of  $\text{Et}_2\text{O}$  into a  $\text{CH}_3\text{CN}$  solution. Single brown crystals of (**1**)( $\text{ClO}_4^-$ ) were formed and collected by filtration (342 mg, 80 %). ESI MS,  $m/z$ , 536 (M -  $\text{CH}_3\text{CN}$  -  $\text{ClO}_4^-$ ). Anal. Calcd for  $\text{C}_{29}\text{H}_{29}\text{ClCuFN}_5\text{O}_7$ : C, 51.41; H, 4.31; N, 10.34. Found: C, 51.26; H, 4.35; N, 10.40 %. UV-Vis ( $\lambda_{\text{max}}$  [nm] [ $\epsilon / \text{M}^{-1} \cdot \text{cm}^{-1}$ ]): 510 [910], 654 [260]. EPR (9.41 GHz,  $\text{CH}_3\text{CN}$ , 100 K): broad signal at  $g \approx 2$ .

(**1H**)( $\text{ClO}_4^-$ ) $_2$ : 2-*tert*-butyl-6-[[[(6-fluoro-quinolin-2-ylmethyl)-pyridin-2-ylmethyl-amino]-methyl]-4-nitro-phenol (300 mg, 0.633 mmol) was dissolved in  $\text{CH}_3\text{CN}$  (10 mL) prior to addition of 1 eq of  $\text{Cu}(\text{ClO}_4)_2 \cdot 6 \text{H}_2\text{O}$  (3 ml  $\text{CH}_3\text{CN}$  solution, 234 mg, 0.633 mmol). The volume is reduced to 1 ml, and dry acetonitrile (10 mL) is added. The operation is repeated three times, until the solution turns from green to blue. (**1H**)( $\text{ClO}_4^-$ ) $_2$  was recrystallized by slow diffusion of  $i\text{Pr}_2\text{O}$  (on  $\text{CaCl}_2$ ) into a  $\text{CH}_3\text{CN}$  solution. Blue crystals of (**1H**)( $\text{ClO}_4^-$ ) $_2$  were formed and collected by filtration (200 mg, 40 %). ESI MS,  $m/z$ , 536 (M - H -  $\text{CH}_3\text{CN}$  -  $\text{ClO}_4^-$ ). Anal. Calcd for  $\text{C}_{29}\text{H}_{29}\text{Cl}_2\text{CuFN}_5\text{O}_{11}$ : C, 44.77; H, 3.89; N, 9.00. Found: C, 44.70; H, 3.89; N, 8.90 %. UV-Vis ( $\lambda_{\text{max}}$  [nm] [ $\epsilon / \text{M}^{-1} \cdot \text{cm}^{-1}$ ]): 630 [120]. EPR (9.41 GHz,  $\text{CH}_3\text{CN}$ , 100 K):  $g_{xx} = g_{yy} = 2.065$ ,  $g_{zz} = 2.241$ ,  $A_{xx} = 1.0$  mT,  $A_{yy} = 1.5$  mT,  $A_{zz} = 17.2$  mT.

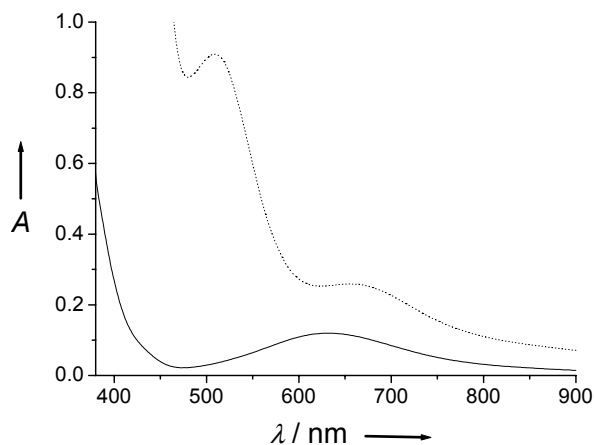

**Fig S1:** UV-Vis spectra of 1 mM CH<sub>3</sub>CN solutions of **1H** (solid lines) and **1** (dotted lines). T = 298 K, l = 1.000 cm.

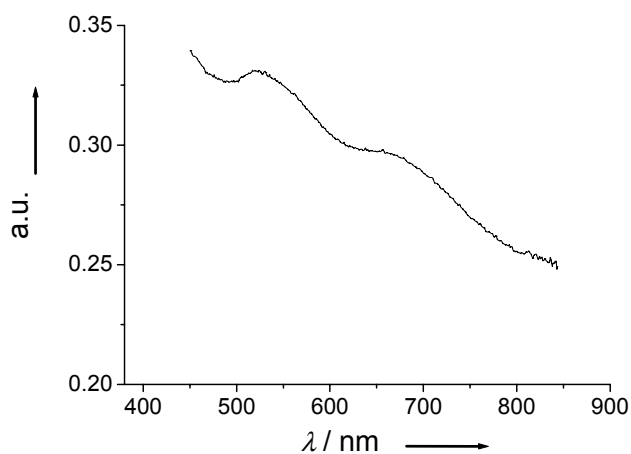

**Fig S2:** Transmittance spectrum of a crystalline powder of **1**. T = 298 K.

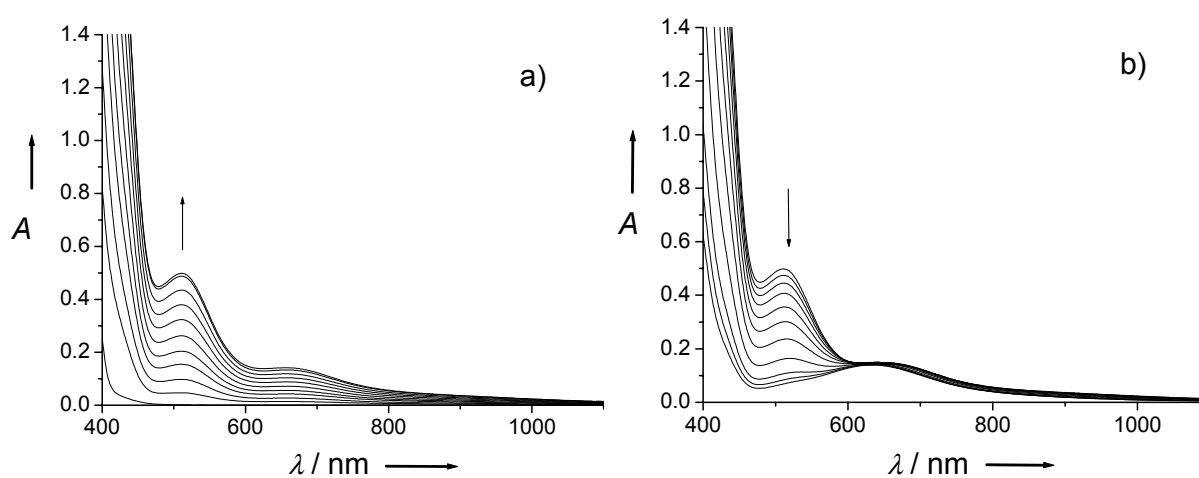

**Fig S3:** Titration of HLq<sup>NO<sub>2</sub></sup> (0.98 mM) by copper(II) perchlorate: a) 0 to 0.5 copper molar equivalent and b) 0.5 to 1 copper molar equivalent. Arrows indicate spectral changes upon addition of copper; spectra were recorded in CH<sub>3</sub>CN at 298 K. l = 1.000 cm.

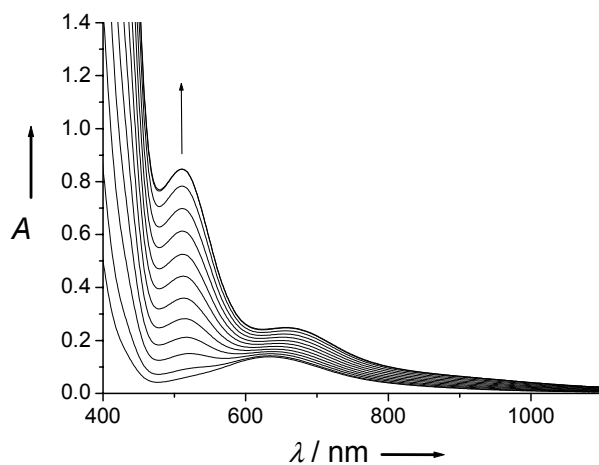

**Fig S4:** Titration of **1H** (0.97 mM) by 0 to 1 molar equivalent of  $\text{NEt}_3$ . Arrows indicate spectral changes upon addition of base; spectra recorded in  $\text{CH}_3\text{CN}$  at 298 K.  $l = 1.000 \text{ cm}$ .

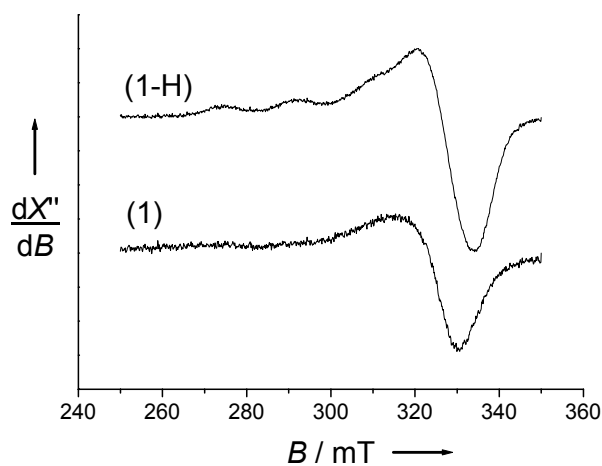

**Fig S5:** X-Band EPR spectra (normalized) of 1 mM  $\text{CH}_3\text{CN}$  solutions of **1H** and **1**. Microwave freq. 9.419 GHz, power: 20 mW; Mod. Freq. 100 kHz, amp. 0.197 mT (**1H**) and 0.0987 mT (**1**);  $T = 100 \text{ K}$ .

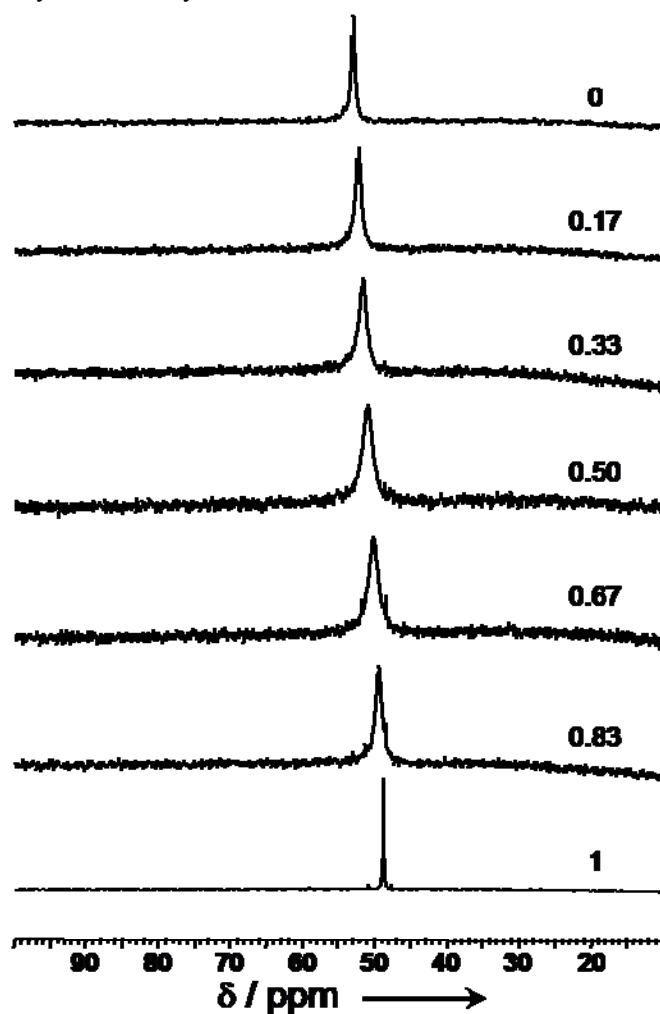

**Fig S6:** Titration of **1H** (60 mM) by  $\text{NEt}_3$ ;  $^{19}\text{F}$  NMR spectra were recorded in  $(\text{CD}_3\text{CN} : \text{CH}_3\text{CN})$  (1 : 4) at 293 K. The numbers correspond to the molar equivalents of base added. The sharp peak at 48 ppm corresponds to an unidentified impurity, accounting for less than 1% of the total  $^{19}\text{F}$  signals. *Intensities are normalized.*

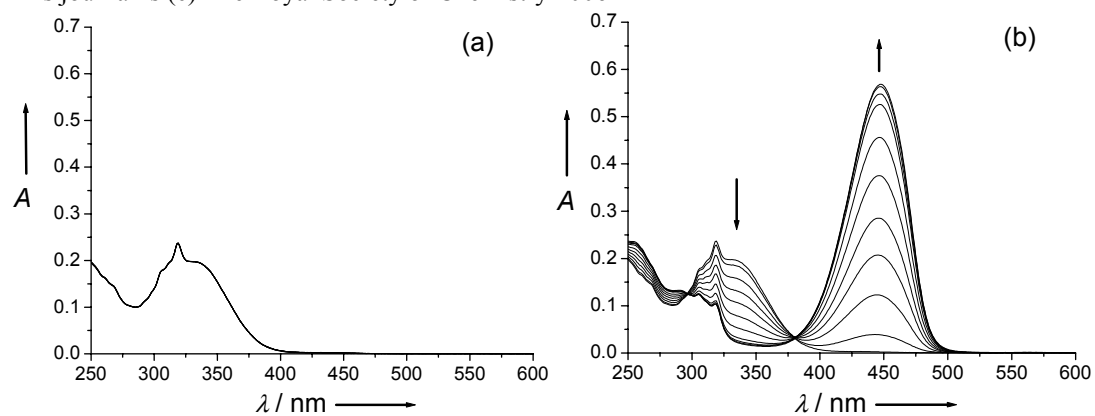

**Fig S7:** Titration of HLq<sup>NO2</sup> ( $1.86 \times 10^{-5}$  M) by: a) 0 to 1 copper molar equivalent of NEt<sub>3</sub> (no spectral changes could be observed) and b) 0 to 1 copper molar equivalent of nBu<sub>4</sub>NOH, showing that only OH<sup>-</sup> deprotonates the nitrophenol of HLq<sup>NO2</sup>. Arrows indicate spectral changes upon addition of base; spectra were recorded in CH<sub>3</sub>CN at 298 K.  $l = 1.000$  cm.
